# Supplementary material for: Protective immunity against Schistosoma japonicum infection can be provided by IgG antibodies towards periodate-sensitive or periodate-resistant glycans
Source: PubMed Central journal article supplement (PMC4408597; doi:10.1186/s13071-015-0842-1), 2015-04-18

**A**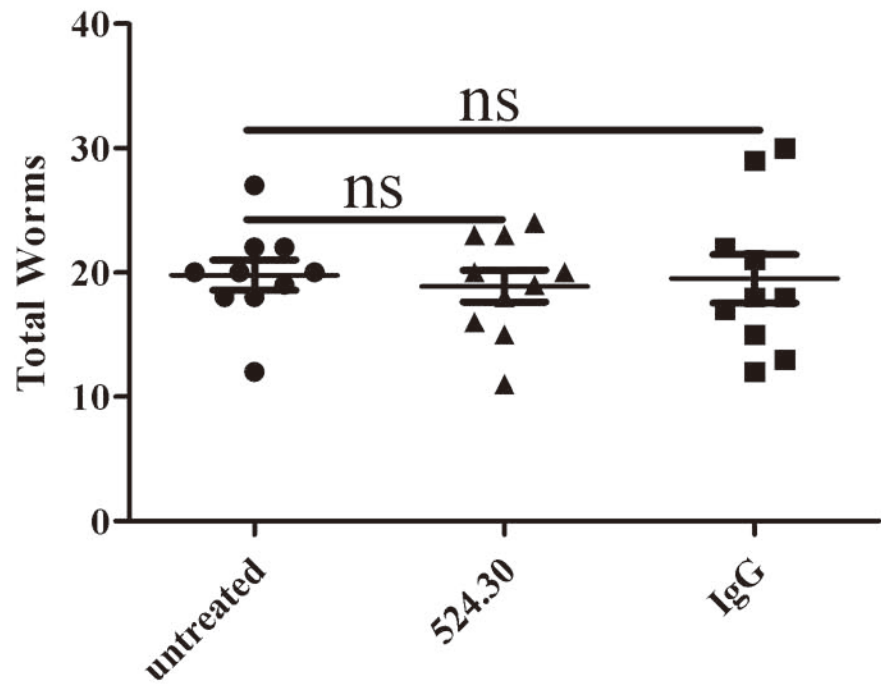**B**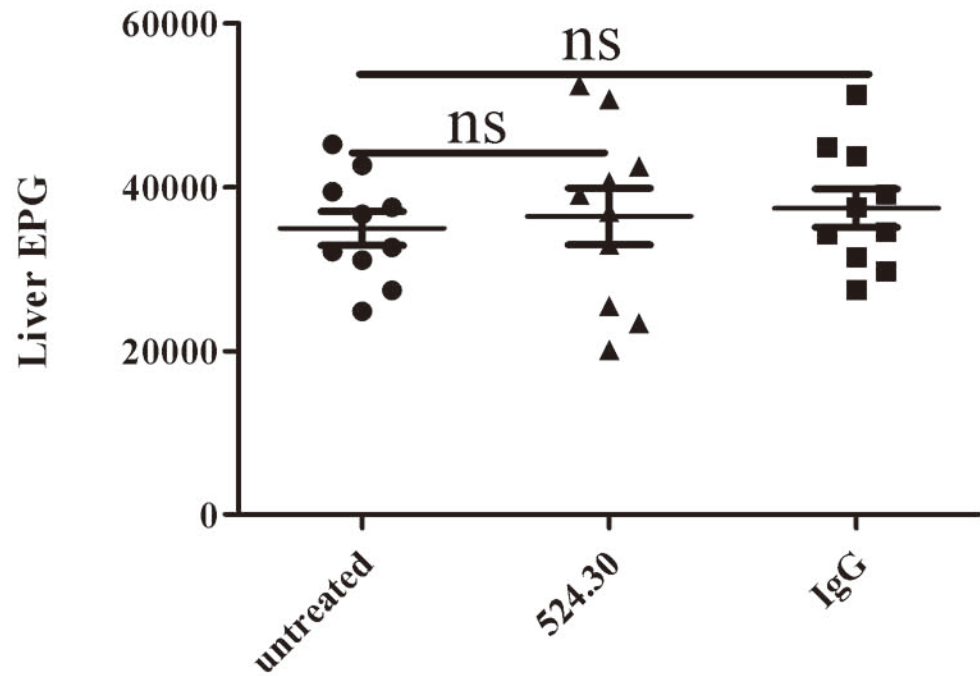

Supplement: 13071_2015_842_MOESM1_ESM.pdf [file 13071_2015_842_MOESM1_ESM.pdf]
